# Supplementary material for: Single-cell RNA-seq reveals that glioblastoma recapitulates a normal neurodevelopmental hierarchy
Source: PubMed Central journal article supplement (PMC7343844; doi:10.1038/s41467-020-17186-5), 2020-07-08
Supplement: 41467_2020_17186_MOESM3_ESM.pdf [file 41467_2020_17186_MOESM3_ESM.pdf]

## **Description of Additional Supplementary Files**

File Name: Supplementary Data 1

Description: Fetal brain differential gene expression by cell type.

File Name: Supplementary Data 2

Description: - Cancer gene expression in each diffusion component.

File Name: Supplementary Data 3

Description: Cancer gene order for the simplified PCA-based lineage and progenitor scores.

File Name: Supplementary Data 4

Description: - Gene set enrichment analysis of progenitor vs astro-mesenchymal cancer cells.
