# Supplementary material for: Single-cell RNA-seq reveals that glioblastoma recapitulates a normal neurodevelopmental hierarchy
Source: PubMed Central journal article supplement (PMC7343844; doi:10.1038/s41467-020-17186-5), 2020-07-08

Cyclin D3

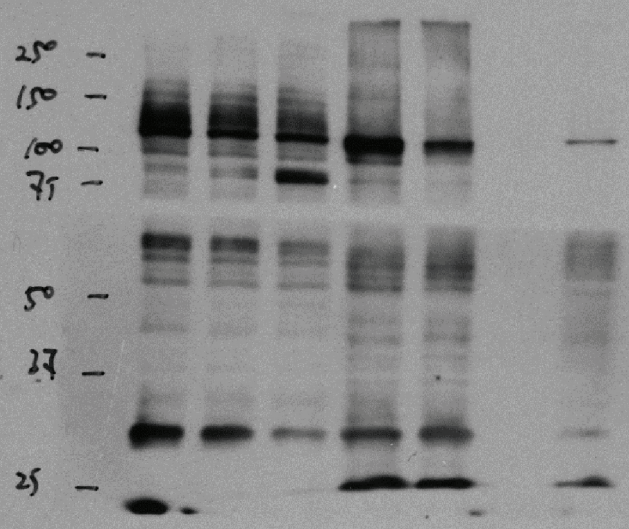

E2F4

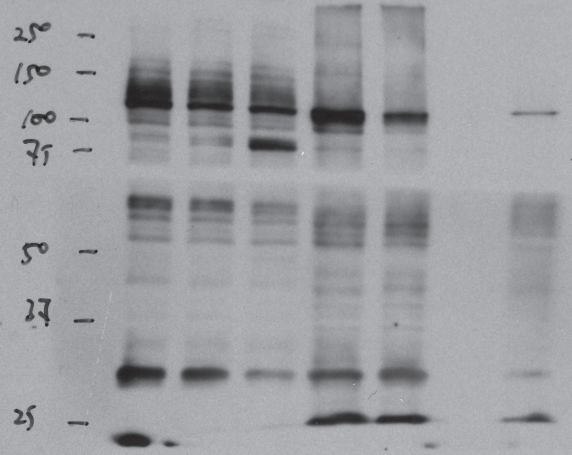

PARP/cleaved PARP

13/07/18

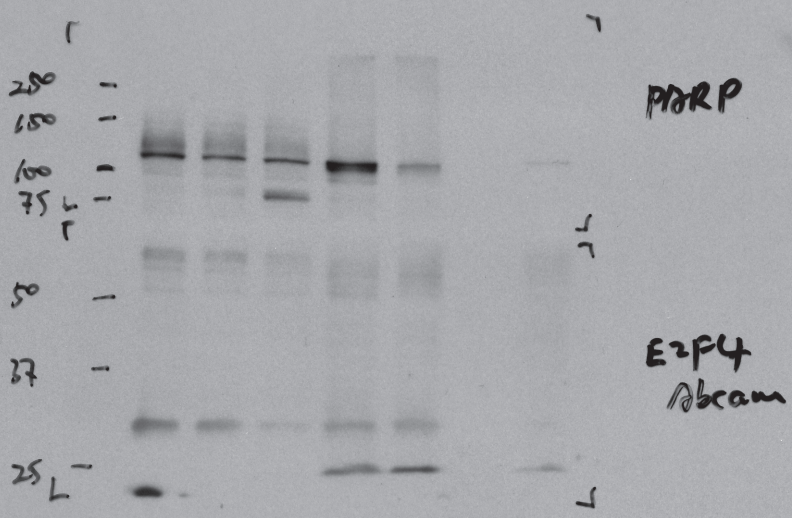

L DMSO 10 20 40 60 L HLM 20  
 HLM 45 days  
 after  
 injection  
 over night

Tubulin

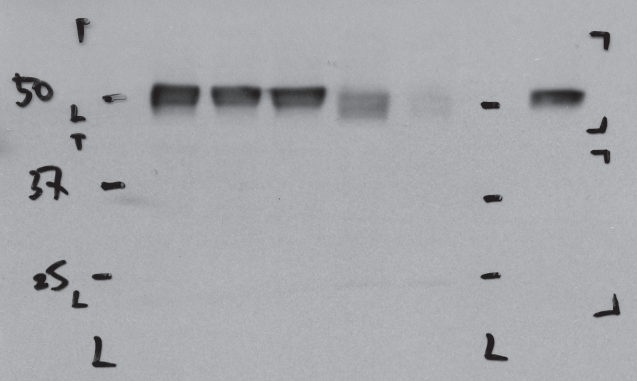

Supplement: 41467_2020_17186_MOESM8_ESM.pdf [file 41467_2020_17186_MOESM8_ESM.pdf]
